# Supplementary material for: Surface-reconstructed formation of hierarchical TiO2 mesoporous nanosheets with fast lithium-storage capability
Source: Royal Society of Chemistry journal article supplement (doi:10.1039/d1qm00065a), 2021-01-01
Supplement: d1qm00065a1.pdf [file d1qm00065a1.pdf]

## Supporting Information

### **Surface-reconstructed formation of hierarchical TiO<sub>2</sub> mesoporous nanosheets with fast lithium-storage capability**

Yuan Liu,<sup>abc</sup> Chenfeng Ding,<sup>ac</sup> Peitao Xie,<sup>a</sup> Xiaodong Yan,<sup>d</sup> Mei Feng,<sup>\*a</sup> Yaochun Liu,<sup>c</sup> Chunzhao Liu,<sup>\*a</sup> Yunhua Yu,<sup>e</sup> and Yuanhua Lin<sup>\*b</sup>

<sup>a</sup>*State Key Laboratory of Bio-fibers and Eco-textiles, Institute of Biochemical Engineering, Affiliated Qingdao Central Hospital, College of Materials Science and Engineering, Qingdao University, Qingdao 266071, China. E-mail: czliu@qdu.edu.cn; Fengmei\_qduzxyy@163.com*

<sup>b</sup>*State Key Lab of New Ceramics and Fine Processing, School of Materials Science and Engineering, Tsinghua University, Beijing 100084, China. E-mail: linyh@mail.tsinghua.edu.cn*

<sup>c</sup>*Foshan (South China) Institute for New Materials, Foshan 528200, China*

<sup>d</sup>*Key Laboratory of Synthetic and Biological Colloids, Ministry of Education, School of Chemical and Material Engineering, Jiangnan University, Wuxi 214122, China.*

<sup>e</sup>*State Key Laboratory of Organic-Inorganic Composites, Beijing University of Chemical Technology, Beijing 100029, China.*

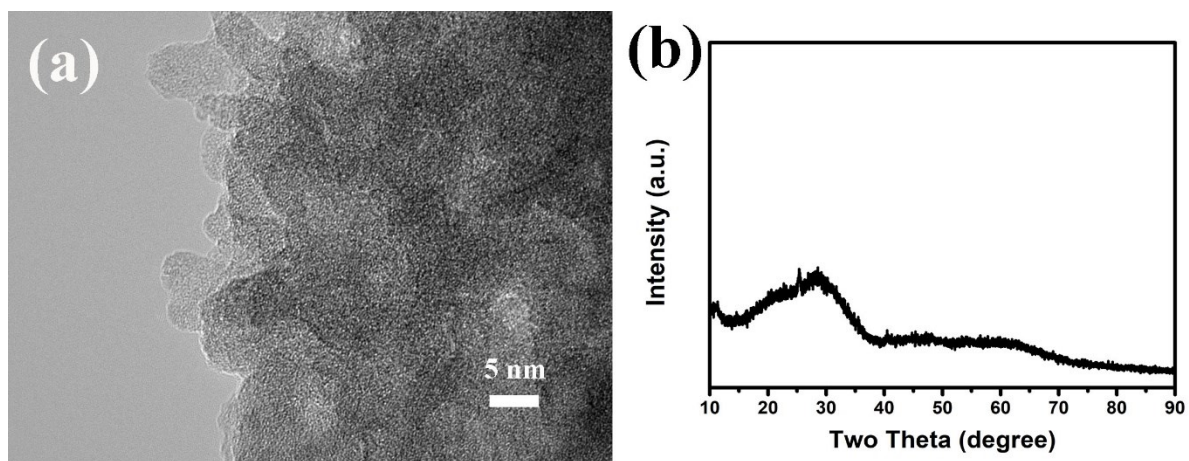

**Figure S1.** (a) HR-TEM image and (b) XRD pattern of the amorphous titania-silica composite nanosheets.

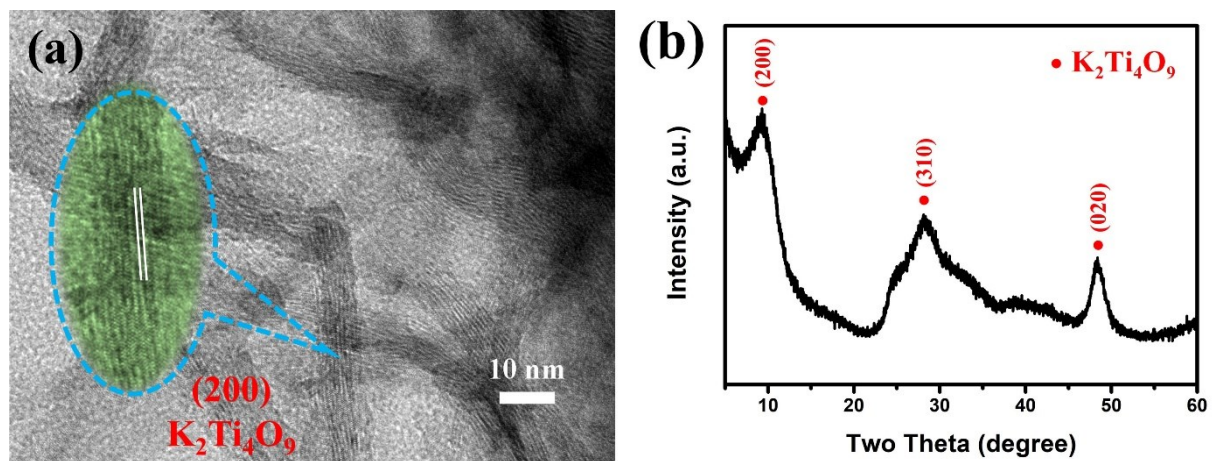

**Figure S2.** (a) HR-TEM image and (b) XRD pattern of the layered KTO.

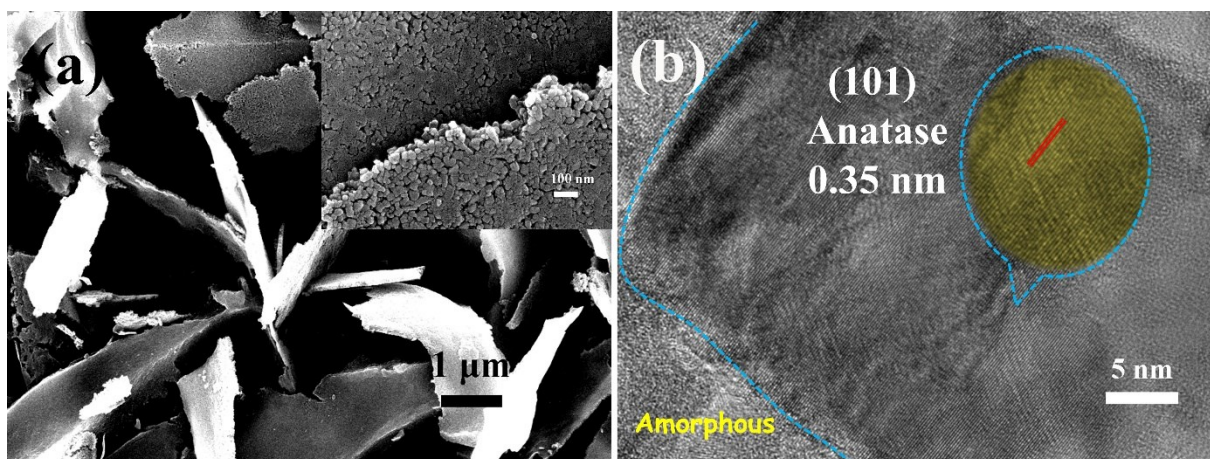

Figure S3. (a) SEM and (b) HR-TEM images of A-TONS.

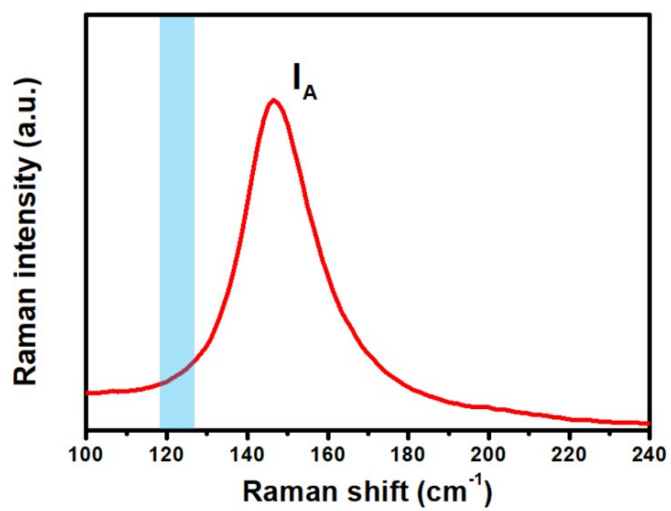

Figure S4. Raman spectrum of A-TONS

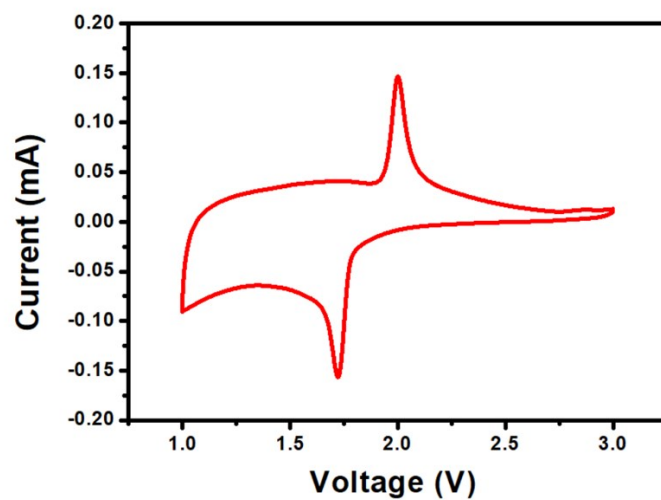

**Figure S5.** CV curve of the A-TONS electrode at the scanning rate of  $0.1 \text{ mV s}^{-1}$ .

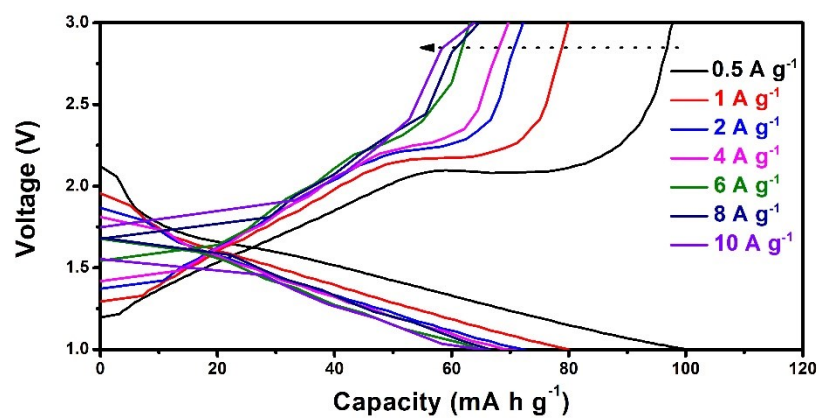

**Figure S6.** Charge-discharge curves of the A-TONS electrode at various current densities.

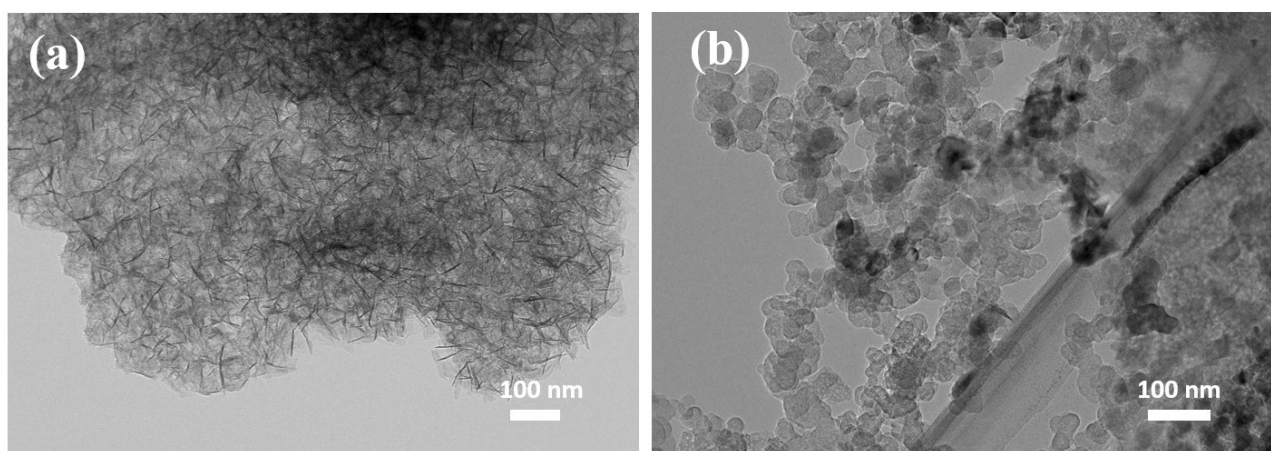

**Figure S7.** TEM images of the SE-TONS (a) and A-TONS (b) electrodes after 1000 cycles.

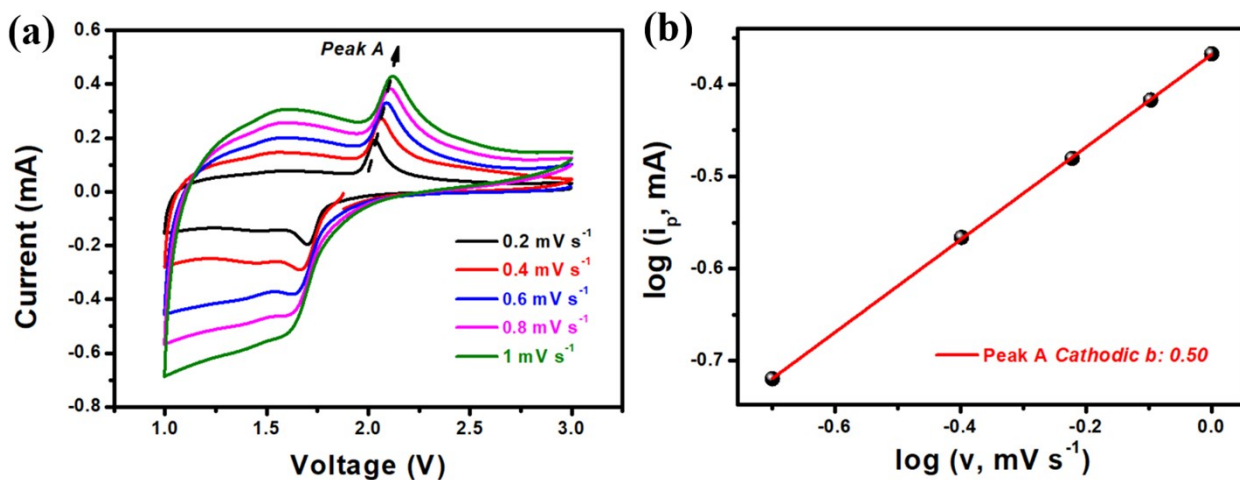

**Figure S8.** (a) CV curves of the A-TONS electrode at various scan rates in the range from 0.2 to 1.0 mV s<sup>-1</sup> and (b) corresponding  $\log(i)$  versus  $\log(v)$  plots of specific peak currents.

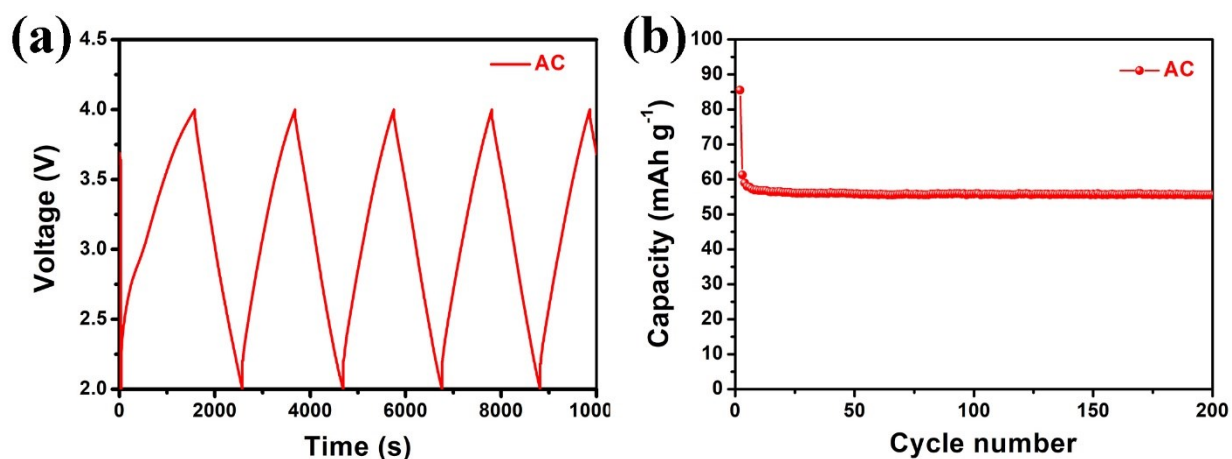

**Figure S9.** (a) Galvanostatic charge-discharge curve and (b) cycling performance of the AC electrode at 1.0 A g<sup>-1</sup> between 2.0 and 4.0 V.
